# Supplementary material for: Analysis and Fine Specificity of the HCMV-Specific Cell-Free and Cell-Associated Antibody-Dependent Cellular Phagocytosis (ADCP) Responses in Lung Transplant Recipients
Source: MDPI journal article supplement (doi:10.3390/ijms22158206), 2021-07-30
Supplement: s1 [file s1]

# Analysis and Fine Specificity of the HCMV-Specific Cell-Free and Cell-Associated Antibody-Dependent Cellular Phagocytosis (ADCP) Responses in Lung Transplant Recipients

## Supplementary Tables

Table S1. Characteristics of D-/R+ patients.

|                                           | D-/R+ Lung-Transplant Recipients (N = 26)                                |                                          |
|-------------------------------------------|--------------------------------------------------------------------------|------------------------------------------|
|                                           | Viremic<br>N = 9 (34.6%)                                                 | Non/Low-Viremic<br>N = 17 (65.4%)        |
| Median Age at LTX (range)                 | 50 (37–69)                                                               | 55 (26–66)                               |
| Gender                                    | Female: N = 3 (33.3%)<br>Male: N = 6 (66.7%)                             | Female: N = 9 (53%)<br>Male: N = 8 (47%) |
| Time points: median days post LTX (range) |                                                                          |                                          |
| T0: Median days (min–max)                 | 1 (0–2)                                                                  | 1 (0–3)                                  |
| T1: Median days (min–max)                 | 92.5 (82–105)                                                            | 90 (77–106)                              |
| T2: Median days (min–max)                 | 180 (176–188)                                                            | 186.5 (159–200)                          |
| T3: Median days (min–max)                 | 280 (267–293)                                                            | 283.5 (251–297)                          |
| T4: Median days (min–max)                 | 363 (352–366)                                                            | 369 (361–391)                            |
| 1st viremic episode <sup>1</sup>          | N = 9 (100%)                                                             |                                          |
| Median days post LTX (range)              | 135 (41–364)                                                             |                                          |
| Median viral load (copies/mL) (range)     | 2.53 × 10 <sup>3</sup> (1.14 × 10 <sup>3</sup> –1.04 × 10 <sup>4</sup> ) |                                          |

D+, HCMV-seropositive donor; D-, HCMV-seronegative donor; HCMV, human cytomegalovirus; LTX, lung transplantation; R+, HCMV-seropositive recipient; R-, HCMV-seronegative recipient. <sup>1</sup> Four patients had a 2nd viremic episode (median 1.69 × 10<sup>3</sup> copies/mL (1.05 × 10<sup>3</sup>–1.29 × 10<sup>4</sup> copies/mL)) after median 205.5 days (135–258 days) within the follow-up.

**Table S2.** Characteristics of D+/R+ patients.

|                                           | <b>D+/R+ Lung-Transplant Recipients (N = 31)</b>                         |                                               |
|-------------------------------------------|--------------------------------------------------------------------------|-----------------------------------------------|
|                                           | <b>Viremic<br/>N = 16 (51.6%)</b>                                        | <b>Non/Low-Viremic<br/>N = 15 (48.4%)</b>     |
| Median Age at LTX (range)                 | 58.5 (18–65)                                                             | 60 (21–68)                                    |
| Gender                                    | Female: N = 8 (50%)<br>Male: N = 8 (50%)                                 | Female: N = 5 (33.3%)<br>Male: N = 10 (66.7%) |
| Time points: median days post LTX (range) |                                                                          |                                               |
| T0: Median days (min–max)                 | 0 (0–3)                                                                  | 1 (0–4)                                       |
| T1: Median days (min–max)                 | 93 (76–115)                                                              | 93 (84–103)                                   |
| T2: Median days (min–max)                 | 182 (155–200)                                                            | 180 (161–194)                                 |
| T3: Median days (min–max)                 | 288 (251–322)                                                            | 276 (247–291)                                 |
| T4: Median days (min–max)                 | 390.5 (343–403)                                                          | 365 (354–389)                                 |
| 1st viremic episode <sup>1</sup>          | N = 16 (100%)                                                            |                                               |
| Median days post LTX (range)              | 133.5 (16–254)                                                           |                                               |
| Median viral load (copies/mL) (range)     | 2.64 × 10 <sup>3</sup> (1.07 × 10 <sup>3</sup> –1.12 × 10 <sup>5</sup> ) |                                               |

D+, HCMV-seropositive donor; D–, HCMV-seronegative donor; HCMV, human cytomegalovirus; LTX, lung transplantation; R+, HCMV-seropositive recipient; R–, HCMV-seronegative recipient. <sup>1</sup> Three patients had a 2nd viremic episode (median 3.3 × 10<sup>3</sup> copies/mL (2.9 × 10<sup>3</sup>–1.48 × 10<sup>4</sup> copies/mL)) after median 207 days (134–262 days) within the follow-up.

**Table S3.** Characteristics of D+/R- patients.

|                                           | <b>D+/R- Lung-Transplant Recipients (N = 18)</b>                         |                                              |
|-------------------------------------------|--------------------------------------------------------------------------|----------------------------------------------|
|                                           | <b>Viremic<br/>N = 11 (61.1%)</b>                                        | <b>Non/Low-Viremic<br/>N = 7 (38.9%)</b>     |
| Median Age at LTX (range)                 | 31 (21-63)                                                               | 45 (22-61)                                   |
| Gender                                    | Female: N = 4 (36.4%)<br>Male: N = 7 (63.6%)                             | Female: N = 3 (42.9%)<br>Male: N = 4 (57.1%) |
| Time points: median days post LTX (range) |                                                                          |                                              |
| T0: Median days (min-max)                 | 1 (0-2)                                                                  | 2 (1-6)                                      |
| T1: Median days (min-max)                 | 89.5 (78-99)                                                             | 87.5 (80-117)                                |
| T2: Median days (min-max)                 | 182 (157-215)                                                            | 196 (177-209)                                |
| T3: Median days (min-max)                 | 275 (252-296)                                                            | 265 (254-293)                                |
| T4: Median days (min-max)                 | 367 (343-398)                                                            | 370 (359-380)                                |
| T5: Median days (min-max)                 | 468 (457-480)                                                            | 466 (446-477)                                |
| T6: Median days (min-max)                 | 534 (521-593)                                                            | 544 (511-583)                                |
| T7: Median days (min-max)                 | 654 (592-684)                                                            | 648 (595-678)                                |
| T8: Median days (min-max)                 | 709 (675-717)                                                            | 714 (691-776)                                |
| 1st viremic episode <sup>1</sup>          | N = 11 (100%)                                                            |                                              |
| Median days post LTX (range)              | 179 (65-469)                                                             |                                              |
| Median viral load (copies/mL) (range)     | 3.89 × 10 <sup>3</sup> (1.16 × 10 <sup>3</sup> -8.16 × 10 <sup>4</sup> ) |                                              |

D+, HCMV-seropositive donor; D-, HCMV-seronegative donor; HCMV, human cytomegalovirus; LTX, lung transplantation; R+, HCMV-seropositive recipient; R-, HCMV-seronegative recipient. <sup>1</sup> Two patients had a 2nd viremic episode (median 7.49 × 10<sup>3</sup> copies/mL (1.6 × 10<sup>3</sup>-1.3 × 10<sup>4</sup> copies/mL)) after median 433.5 days (420-447 days) within the follow-up.

**Table S4.** Serology of Lung-Transplant Recipients.

| Serostatus       | Study Cohort                                 |                                   |                                              |                                   |                                              |                                  |
|------------------|----------------------------------------------|-----------------------------------|----------------------------------------------|-----------------------------------|----------------------------------------------|----------------------------------|
|                  | D-/R+ Lung-Transplant Recipients<br>(N = 26) |                                   | D+/R+ Lung-Transplant Recipients<br>(N = 31) |                                   | D+/R- Lung-Transplant Recipients<br>(N = 18) |                                  |
|                  | Viremic<br>N = 9 (34.8%)                     | Non/Low-Viremic<br>N = 17 (65.4%) | Viremic<br>N = 16 (51.6%)                    | Non/Low-Viremic<br>N = 15 (48.4%) | Viremic<br>N = 11 (61.1%)                    | Non/Low-Viremic<br>N = 7 (38.9%) |
| gB-specific IgG1 | N = 8 (88.94%)                               | N = 15 (88.24%)                   | N = 13 (81.25%)                              | N = 13 (86.68%)                   | N = 9 (81.82%)                               | N = 4 (57.14%)                   |
| gB-specific IgG3 | N = 7 (77.78%)                               | N = 16 (94.12%)                   | N = 15 (93.75%)                              | N = 1 (93.33%)                    | N = 9 (81.82%)                               | N = 6 (85.71%)                   |
| PC-specific IgG1 | N = 3 (33.33%)                               | N = 15 (88.24%)                   | N = 9 (56.25%)                               | N = 12 (80%)                      | N = 11 (100%)                                | N = 4 (57.14%)                   |
| PC-specific IgG3 | N = 8 (88.94%)                               | N = 14 (82.35%)                   | N = 16 (100%)                                | N = 15 (100%)                     | N = 11 (100%)                                | N = 5 (71.42%)                   |

D+, HCMV-seropositive donor; D-, HCMV-seronegative donor; gB: glycoprotein B; HCMV, human cytomegalovirus; LTX, lung transplantation; PC: pentameric complex; R+, HCMV-seropositive recipient; R-, HCMV-seronegative recipient.



## Supplementary Figures

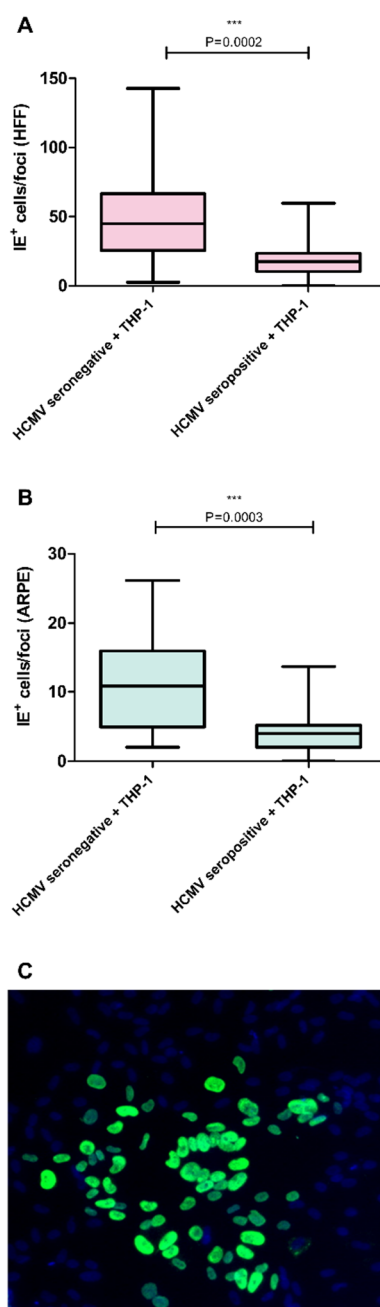

**Figure S1.** Establishment of the plasma-dependent focus expansion assay (FEA) with THP-1 cells on (A) Human Foreskin Fibroblasts (HFF) (B) or epithelial cells (ARPE) with HCMV-seropositive (N = 80) and HCMV-seronegative (N = 20) plasma samples. Data are shown as mean values (min–max). Plaque sizes between different experimental settings were compared by Mann Whitney-Test. (C) Representative example of a HCMV focus on human foreskin fibroblasts (HFF) in the presence of THP-1 cells and a HCMV-seronegative control plasma.  $p < 0.05$  was considered significant. \*\*\*,  $p < 0.001$ . IE<sup>+</sup>, HCMV-immediately early positive cells.

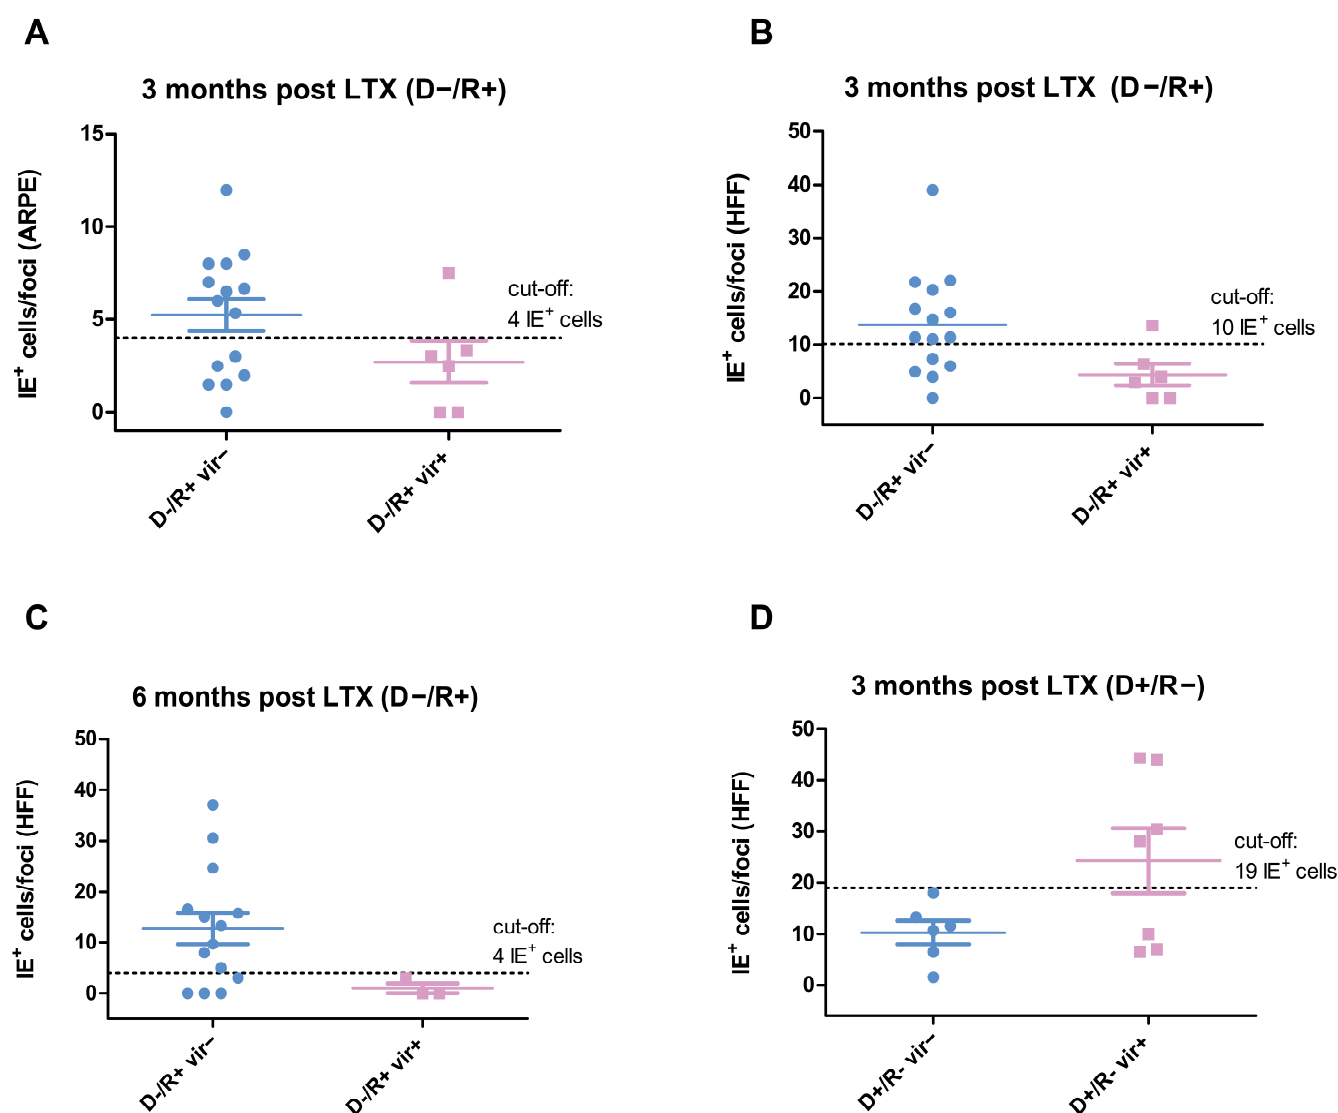

**Figure S2.** Estimated cut-offs for calculation of positive predictive values (PPV) and negative predictive values (NPV) in either epithelial cells (ARPE) (**A**) or fibroblasts (HFF) (**B–D**) in viremic (pink) and non viremic (blue) D-/R+ (**A,C**) and D+/R- (**D**) lung transplant recipients (LTRs) at several time points post lung transplantation (LTX). The dashed black line indicates the set cut-off.

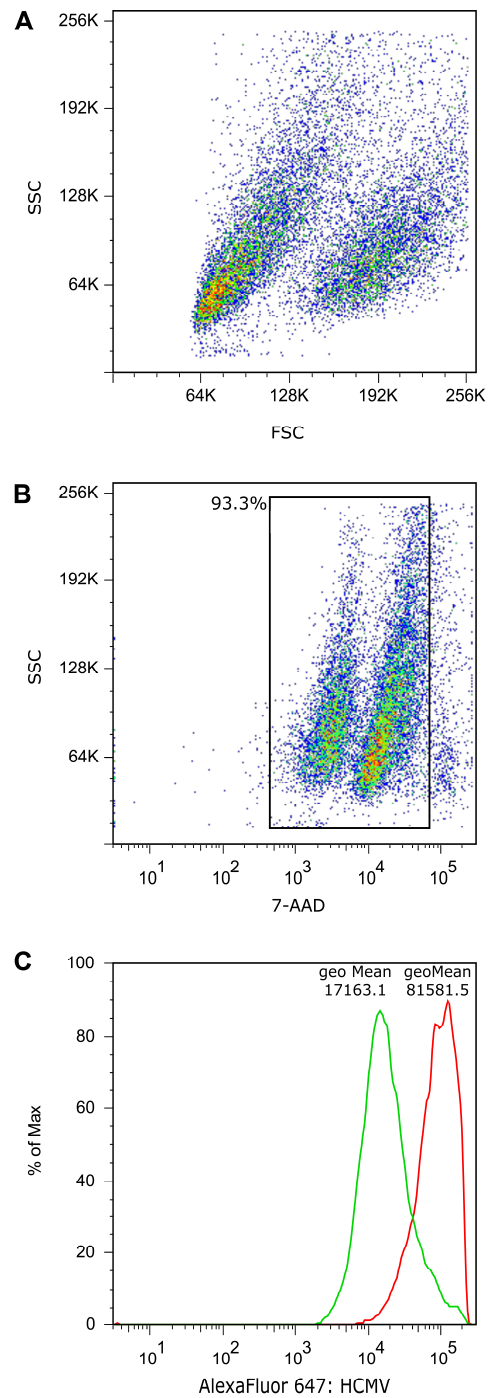

**Figure S3.** Representative example of the gating strategy and determination of life (7-AAD<sup>low</sup>) THP-1 cells (**A,B**) stimulated with TB40E cell-free virions and either a HCMV-seropositive (red) or a HCMV-seronegative (green) control plasma (**C**).

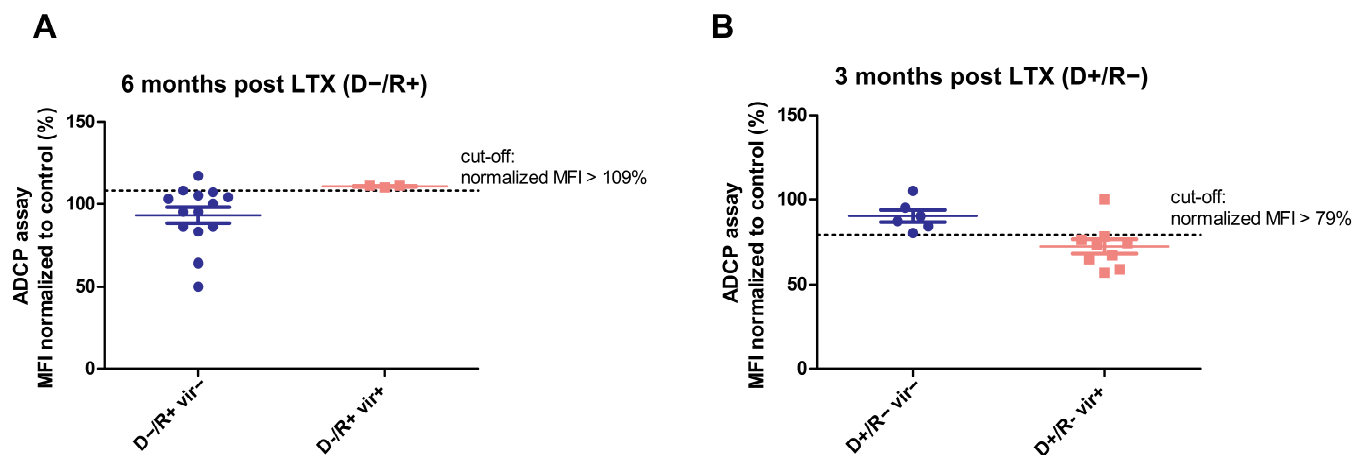

**Figure S4.** Estimated cut-offs for calculation of positive predictive values (PPV) and negative predictive values (NPV) in viremic (pink) and non/viremic (blue) D-/R+ lung transplant recipients (LTRs) at 6 months post lung transplantation (LTX) (A) and D+/R- LTRs at 3 months post lung transplantation (LTX) (B). The dashed black line indicates the set cut-off.

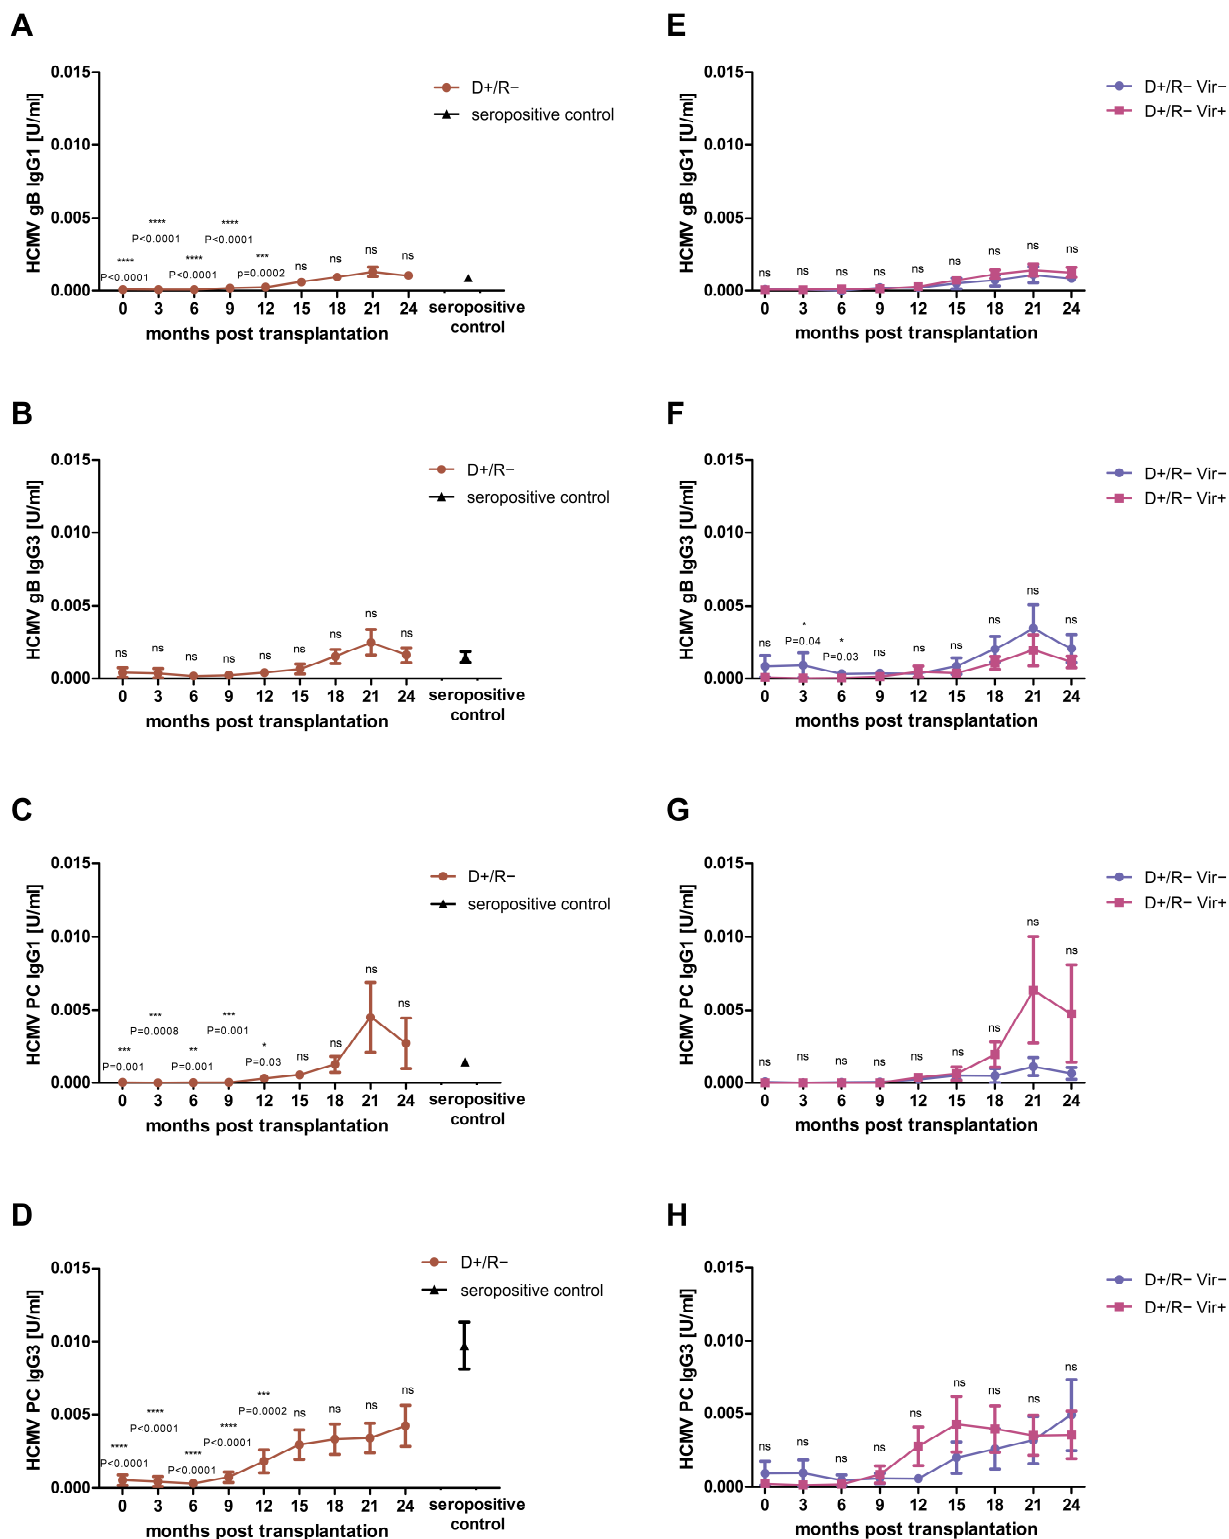

**Figure S5.** Analysis of HCMV-specific gB IgG1 titers (A,E), gB IgG3 titers (B,F), PC IgG1 titers (C,G), and PC IgG3 titers (D,H) in D+/R- lung transplant recipients (LTRs) after lung-transplantation (LTX). Patients were tested at 0, 3, 6, 9, 12, 15, 18, 21 and 24 months post LTX. Data are shown as mean antibody titers ( $\pm$  SEM). (A–D) Mean value ( $\pm$  SEM) of the HCMV-seropositive control cohort (N = 80) is indicated as black triangle. (A–D) Antibody levels at each time point of D+/R- LTRs were compared with those of the seropositive control patients ANOVA and Dunn’s post-test. (E–H) Antibody levels at each time point of viremic (blue) (>1000 copies/mL) D+/R- LTRs were compared with those of non/low-viremic (pink) (<1000 copies/mL) D+/R- LTRs by Mann Whitney-Test;  $p < 0.05$  was considered significant. \*,  $p < 0.05$ ; \*\*,  $p < 0.01$ ; \*\*\*,  $p < 0.001$ ; \*\*\*\*,  $p < 0.0001$ . U/mL, units/milliliter; gB: glycoprotein B; PC: pentameric complex.

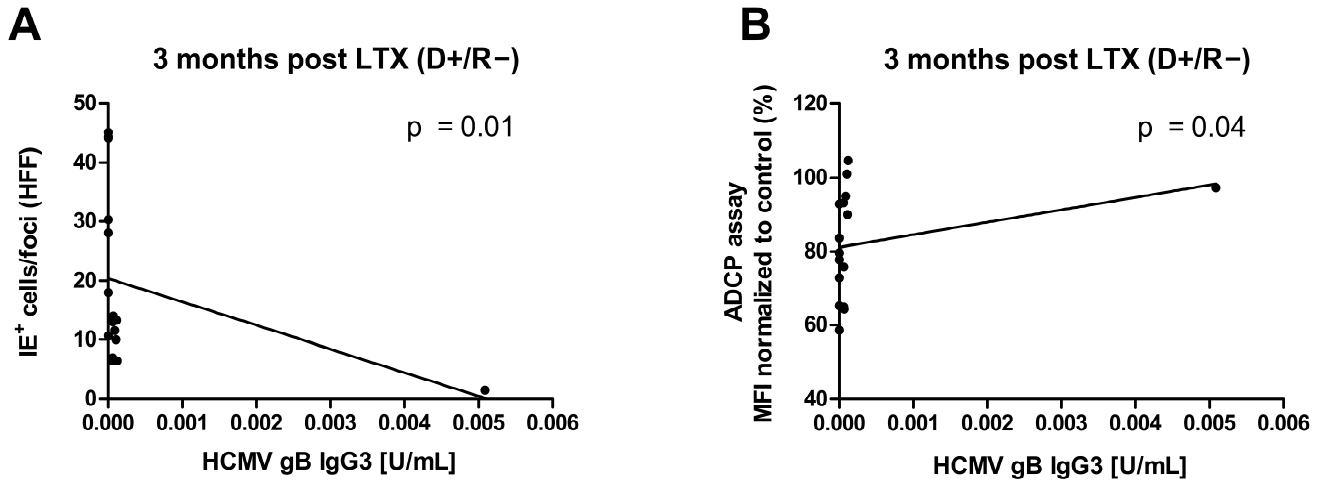

**Figure S6.** Correlation analysis of the HCMV-specific ADCP responses and HCMV-specific antibody titers in D+/R- LTRs. gB-specific IgG3 titers obtained at 3 months post-LTX were correlated with individual mean plaque sizes of Focus Expansion Assays (FEA) on fibroblasts (HFF) (**A**) or mean normalized mean fluorescence intensity (MFI) of antibody-dependent cellular phagocytosis (ADCP)-assays (**B**) at the same time point. Non-parametric two-tailed Spearman's rank correlation test was used to evaluate the correlation between HCMV-specific ADCP responses and gB-specific IgG3 titers. The solid black line indicates a linear regression. gB: glycoprotein B.

**A**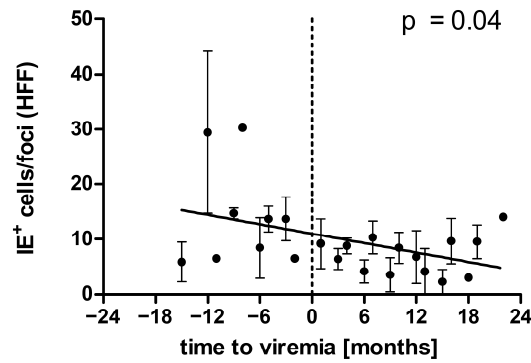**B**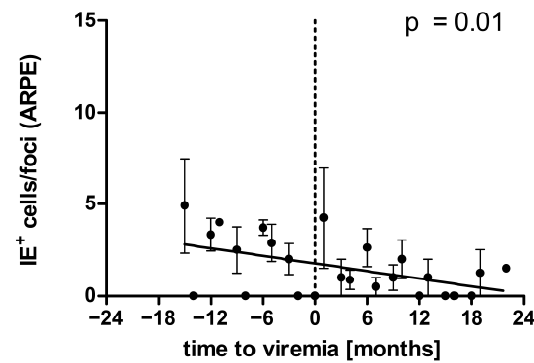**C**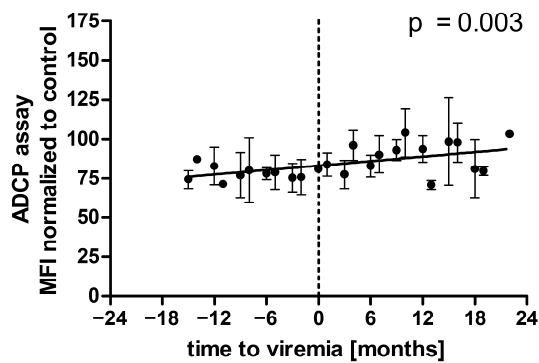

**Figure S7.** Analysis of the Focus Expansion Assay (FEA) on fibroblasts (HFF) (**A**), epithelial cells (ARPE) (**B**) as well the HCMV-specific ADCP response against cell-free virions (**C**) with plasma obtained from D+/R- highly viremic (>1000 copies HCMV DNA/mL) lung transplant recipients (LTRs) after lung transplantation (LTX). D+/R- LTRs were tested at 0, 3, 6, 9, 12, 15, 18, 21 and 24 months post LTX. Data are shown as mean IE<sup>+</sup> /per foci ( $\pm$  SEM) (**A,B**) or as mean normalized mean fluorescence intensity (MFI) ( $\pm$  SEM) (**C**). Non-parametric two-tailed Spearman's rank correlation test was used to evaluate the correlation between HCMV-specific ADCP responses in the post-transplant follow-up. The solid black line indicates a linear regression. The dotted black line indicates the time of the first highly viremic episode.
